# Supplementary material for: Overexpression of Osta-siR2141 caused abnormal polarity establishment and retarded growth in rice
Source: PubMed Central journal article supplement — J Exp Bot. 2010 Jan 15;61(6):1885–95. doi: 10.1093/jxb/erp378 (PMC2852654; doi:10.1093/jxb/erp378), 2010-01-15
Supplement: erp378_1.pdf [file erp378_1.pdf]

## Overexpression of Osta-siR2141 caused abnormal polarity establishment and retarded growth in rice

Jiang Wang, Xiaoyan Gao, Xiangyi Shi, Lin Li, Jingliu Zhang, and Zhenying Shi

Supplemental Table S1 Sequence of primers used in this study

| Gene name         | Sequence for forward primer (5'-3')                            | Sequence for reverse primer (5'-3') |
|-------------------|----------------------------------------------------------------|-------------------------------------|
| <i>actin</i>      | AGGAATGGAAGCTGCGGGTAT                                          | GCAGGAGGACGGCGATAACA                |
| <i>Os01g70270</i> | TGAGATGGCGGTGGAGAAG                                            | TGACTGAAGAAGGCACATTGG               |
| <i>Os05g48870</i> | GCTGAGTTCCTGTCGCCA                                             | GCTCCAACGCCTACATCTAAGA              |
| <i>Os05g43920</i> | GCTGATTGCCGTGGACTTAC                                           | CGGACCTCTCATTAGCATCTTC              |
| <i>Os01g48060</i> | GGGAGATTGAGCTTAGTGGA                                           | GGCAGAACTGATGTGGTTAT                |
| <i>Os01g54990</i> | TGCCGGTGTAGTGAAGTAGAC                                          | GCCCAACATGCAGCTTCGTGTA              |
| <i>OsVPI</i>      | CGGCAGGCGAAGACGGACAAG                                          | CGGCGAGCCATGCTTATG                  |
| <i>Waxy</i>       | TGTTCTGCTGCAACGACTGG                                           | CAGAAGAACGATCTGGAC                  |
| <i>OSHB1</i>      | CGGATTCGGTTGGTATTGTGG                                          | GAAAATCTCATGGGTCGCAAC               |
| <i>OSHB2</i>      | TCTTGGTTCCTGATTGTCGAA                                          | GCCCATTCAGAACGATGTT                 |
| <i>OSHB3</i>      | GCGGAACCATTGAGCTAATC                                           | CCCTCAGAAATCGCACAAGTAG              |
| <i>OSHB4</i>      | GGAAGTTGACTGCGATGAACA                                          | CCACTACAATTGTGCGAAACAG              |
| <i>OSHB5</i>      | GGAAACGCCAGCAACTACCAAG                                         | GAGGCGGGAGGACGAGAG                  |
| <i>Actin(Ar)</i>  | CTCTCTATGCCAGTGGTCGTACAAC                                      | AGAACCTCAGGACAACGGAATC              |
| <i>ARF3</i>       | ATGGGCATCAACAGCGTGTC                                           | ATGTCCCTTCCTTGCGAATGA               |
| <i>ARF4</i>       | TTTGAGGAGTCGGTTAGAC                                            | CATCATACCCGTTAAGTCG                 |
| miR390F           | GGgtcgacGGAAGCTCTTTTAGGCGTTCA                                  |                                     |
| miR390R           | GGgatccCTTCAGAGGTGTGCGTGGAG                                    |                                     |
| siARFF            | CCTTTAGTTTGATTTCGAAAGGTCTTGCAAGGTCAAGAACAAGGATTGTTCCAT<br>ACCC |                                     |
| siARFR            | CCTTTCGAAATCAAATAAAGGTCTTGTCAGGTCAAGACCATGGTTTGTCTTA<br>CCAC   |                                     |
| <i>OsHB3IF</i>    | gggatccGCGGCAATGGCTAGGAGT                                      |                                     |
| <i>OsHB3IR</i>    | gggaattcGTTGGCGAAGGTGAACATAGG                                  |                                     |

Supplemental Figure S1 (next page)

Sketch map of plasmid OsmiR-ARF(390) construction

siR2141  
siR2141\*

MiR390 backbone

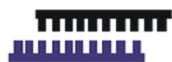

+

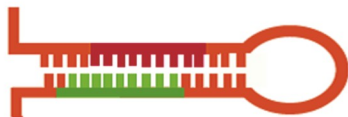

Substitution

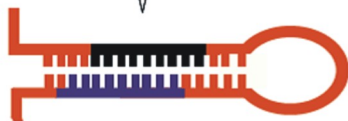

insertion

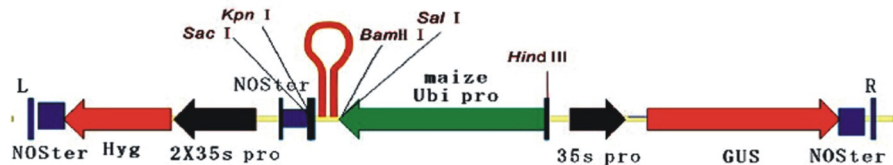

OsmiR-ARF(390)
